# Supplementary material
Source: PubMed Central journal article supplement (PMC1480442)

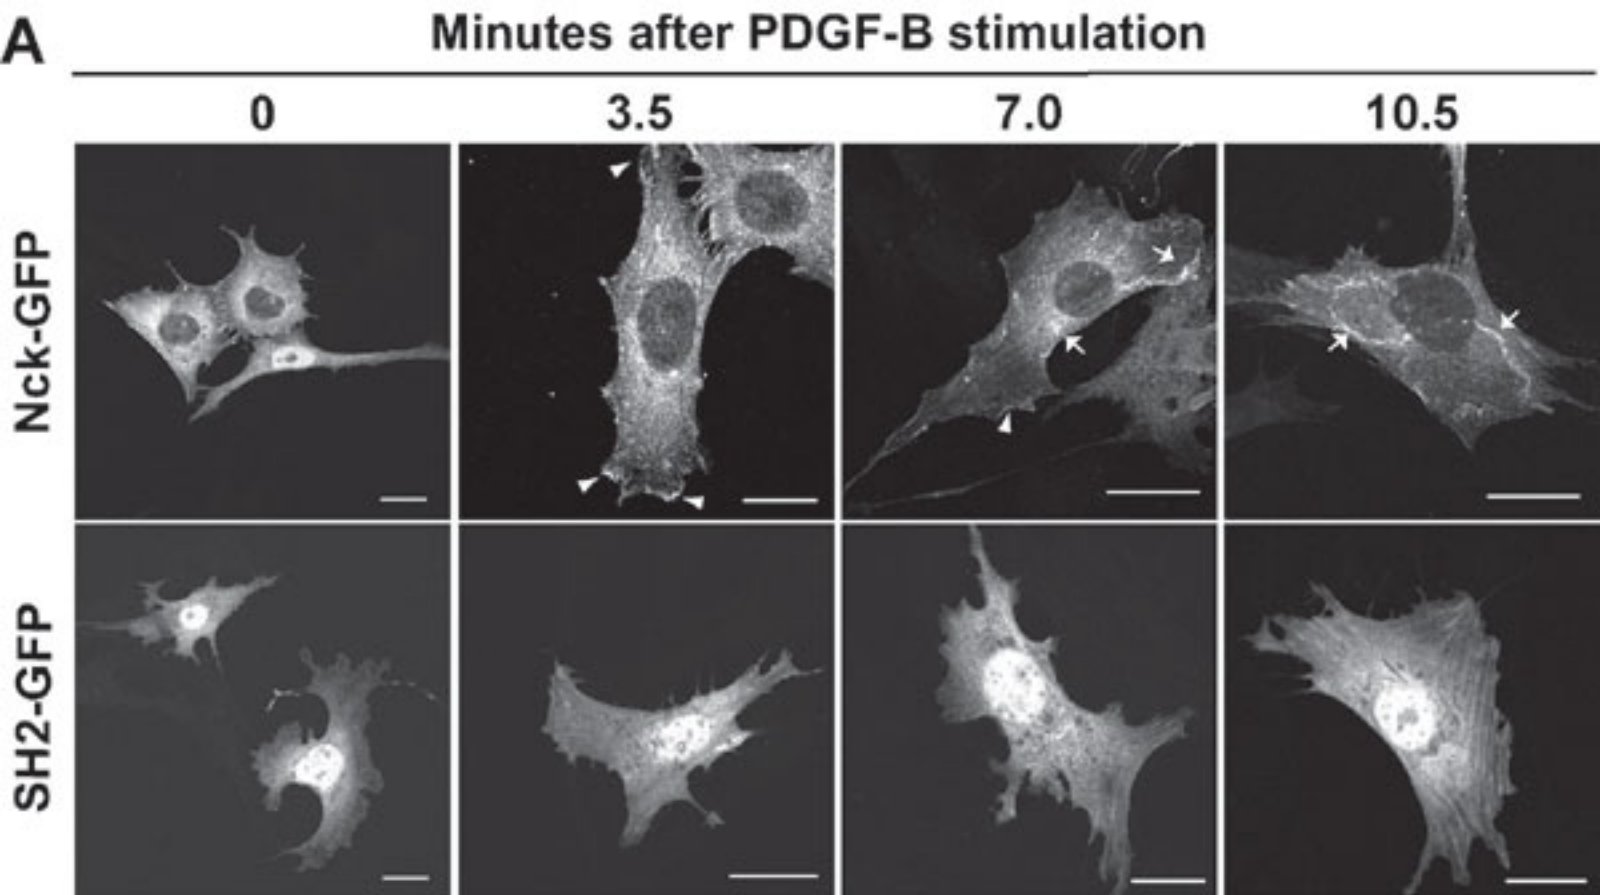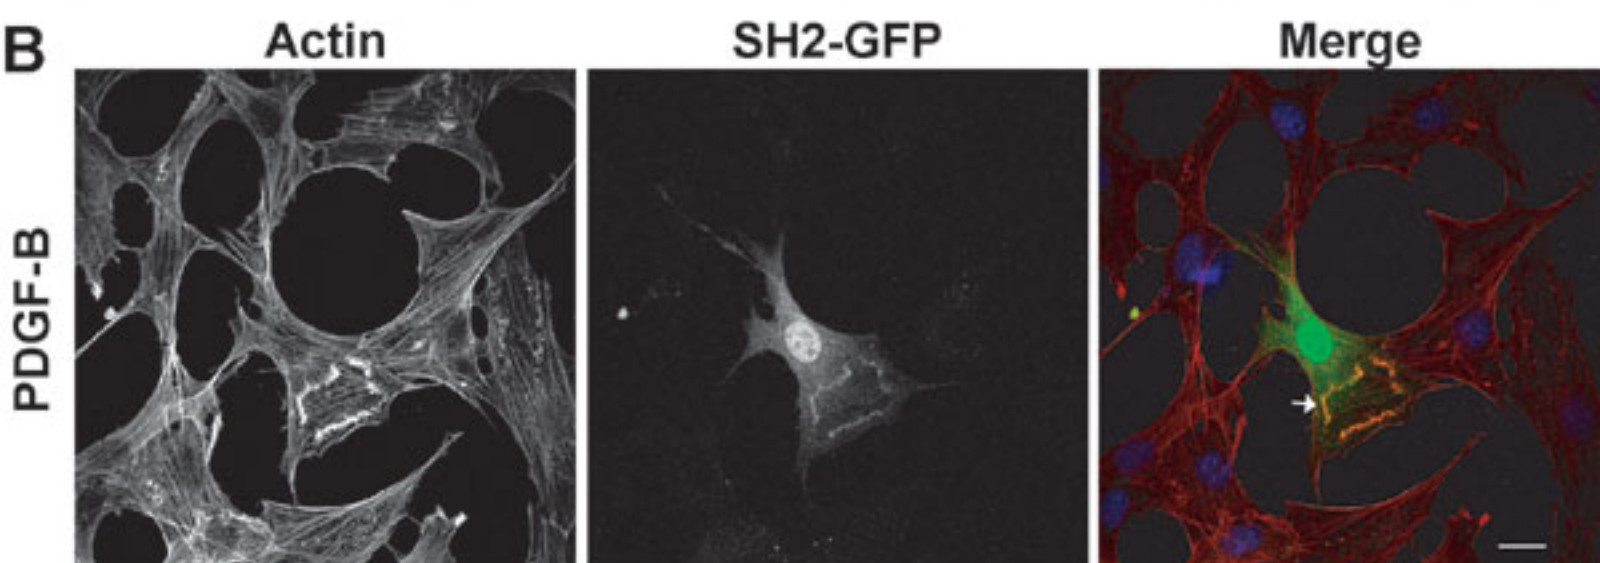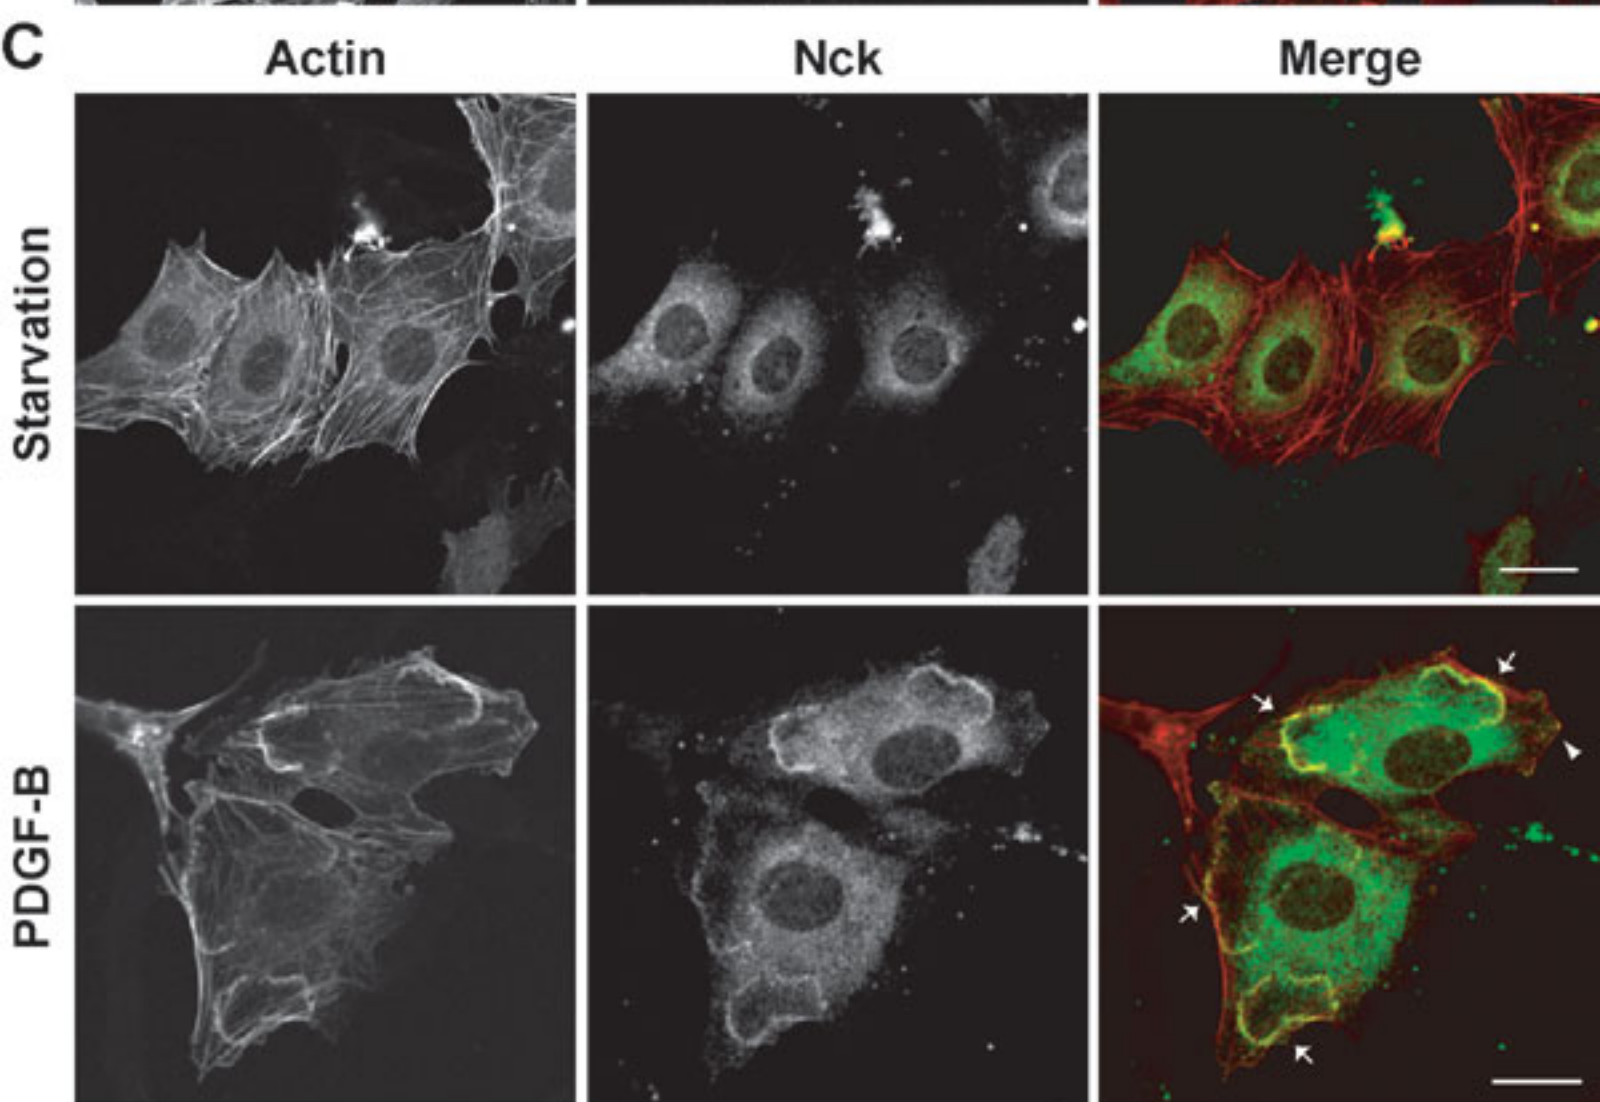

Supplement: pnas_0603786103_9.pdf [file pnas_0603786103_9.pdf]
